# Supplementary material for: Dynamic analysis and control of a rice-pest system under transcritical bifurcations
Source: PeerJ journal article supplement (doi:10.7717/peerj.16083), 2023-10-10
Supplement: Supplemental_Information_2_staff_KT.pdf [file Supplemental_Information_2_staff_KT.pdf]

## Supplemental Information 2. Bifurcation analysis for the rice-pest system

In this section, we investigate the rice-pest system (S4) through transcritical bifurcation analysis (Banerjee & Petrovskii, 2011). For a transcritical bifurcation exists a non-destructible fixed point over the whole bifurcation parameter range, which, however, changes its stability characteristic for altered bifurcation parameters (Banerjee & Petrovskii, 2011). For the transcritical bifurcation analysis of the rice-pest system (S4), it is more convenient to use a dimensionless rice-pest system (S4) which reduces the number of parameters (Banerjee & Petrovskii, 2011). In this case, we introduce the dimensionless variables  $x_1(t) = x^* \cdot \hat{x}$  and  $x_2(t) = y^* \cdot \hat{y}$  and consider the dimensionless time  $t = \tau^* \sigma$ . Removing the symbols '\*' and '^', the system (S4) becomes dimensionless given as

$$\begin{cases} \frac{dx}{d\tau} = x(\alpha - x) - xy \equiv f_1(x, y) \\ \frac{dy}{d\tau} = \beta xy - y - \gamma y^2 \equiv f_2(x, y) \end{cases} \quad (\text{S16})$$

where  $\sigma = \frac{1}{\alpha_2}$ ,  $\alpha = \frac{\alpha_1}{\alpha_2}$ ,  $\beta = \frac{\beta_2}{d_1}$ ,  $\gamma = \frac{d_2}{\beta_1}$ .

The biologically meaningful equilibria of the system (S16) are the non-negative solutions of  $f_1(x, y) = 0$  and  $f_2(x, y) = 0$ . The rice (prey) isocline consists of the axis  $x = 0$  and the straight line  $y = \alpha - x$  and the pests (predator) isocline consists of the axis  $y = 0$  and the line  $x = \frac{1 + \gamma y}{\beta}$  (Banerjee & Petrovskii, 2011). Correspondingly, the system (S16) is bounded by two equilibrium points, the trivial/pre-cultural equilibrium  $E_0(x, y) = (0, 0)$  and the pest-free equilibrium  $E_1(x, y) = (\alpha, 0)$ . An interior equilibrium  $E_*(x, y) = (x_*, y_*)$  with  $(x_*, y_*) = \left( \frac{1 + \gamma y_*}{\beta}, \alpha - x_* \right) = \left( \frac{\alpha \gamma + 1}{\beta + \gamma}, \frac{\alpha \beta - 1}{\beta + \gamma} \right)$  can be found at the intersection of the two isoclines. For the existence of  $E_*$ , the value of the parameters must follow the conditions  $\alpha \gamma + 1 \geq 0$ ,  $\beta + \gamma > 0$  and  $\alpha \beta - 1 \geq 0$ .

**Theorem 2.1.** *The system (S16) experiences transcritical bifurcation at the pest-free equilibrium point  $E_1(\alpha, 0)$  as the growth parameter  $\alpha$  passes through the critical value  $\alpha^*$ .*

**Proof** At the pest-free equilibrium point  $E_1(\alpha, 0)$ , the associated Jacobian matrix of the system (S16) takes the form:

$$J_{E_1}(\alpha^*) = \begin{bmatrix} -\alpha & 0 \\ 0 & 0 \end{bmatrix} \quad (\text{S17})$$

The set of eigenvalues of  $J_{E_1}(\alpha^*)$  is  $\lambda = \begin{bmatrix} -\alpha \\ 0 \end{bmatrix}$  i.e., one eigenvalue is zero and the other is negative since  $\alpha > 0$ .

Therefore, to examine the nature of the system at  $E_1$ , we have applied *Sotomayor's theorem* (Perko, 2000). For this purpose, we consider the system (S16) as

$$f(x, y) = \begin{pmatrix} f_1(x, y) \\ f_2(x, y) \end{pmatrix} \quad (\text{S18})$$

Let the eigenvectors corresponding to the zero eigenvalues of  $J_{E_1}(\alpha^*)$  and  $J_{E_1}^T(\alpha^*)$  be  $V$  and  $W$ , respectively,

where  $V = W = \begin{bmatrix} 1 \\ 0 \end{bmatrix}$ . From Eq. (S18), we have  $f_\alpha(E_1; \alpha^*) = \begin{bmatrix} \alpha \\ 0 \end{bmatrix}$ ,  $Df_\alpha(E_1; \alpha^*) = \begin{bmatrix} \alpha & 0 \\ 0 & 0 \end{bmatrix}$  and

$D^2 f(E_1; \alpha^*)(V, V) = \begin{bmatrix} -2 \\ 0 \end{bmatrix}$ . Here,  $Df$  denotes the partial derivative of  $f$  with respect to  $x$  and  $y$ , and  $Df_\alpha$  denotes

the partial derivative of  $f$  with respect to the parameter  $\alpha$ . Therefore,

$$\begin{aligned} W^T f_\alpha(E_1; \alpha^*) &= \alpha \neq 0 \\ W^T [Df_\alpha(E_1; \alpha^*)V] &= \alpha \neq 0 \end{aligned}$$

$$W^T \left[ D^2 f(E_1; \alpha^*)(V, V) \right] = -2 \neq 0$$

Hence, there is a saddle-node bifurcation at the nonhyperbolic equilibrium point  $E_1(\alpha, 0)$  at the bifurcation value  $\alpha$ . For  $\alpha < 0$ , there is no equilibrium point. For  $\alpha = 0$ , the  $f_1(x, y) = -x^2$  is structurally unstable and the bifurcation value  $\alpha = 0$ . Therefore, there is a transcritical bifurcation at the origin for  $\alpha = 0$ . There are two equilibria at origin  $(0, 0)$  and  $E_1(\alpha, 0)$  (Perko, 2000).

**Theorem 2.2.** *The system (S16) experiences a transcritical bifurcation at the equilibrium point  $E_*(x_*, y_*)$  as the growth parameter of the pest species population  $\beta$  passes through the critical value  $\beta^*$ .*

**Proof** At the equilibrium point  $E_*(x_*, y_*)$ , the associated Jacobian matrix of the system (S16) takes the form:

$$J_{E_*}(\beta^*) = \begin{bmatrix} -\frac{\alpha\gamma+1}{\beta+\gamma} & -\frac{\alpha\gamma+1}{\beta+\gamma} \\ \frac{\alpha\beta^2-\beta}{\beta+\gamma} & \frac{\gamma(1-\alpha\beta)}{\beta+\gamma} \end{bmatrix}. \quad (\text{S19})$$

It can be shown that one eigenvalue of  $J_{E_*}(\beta^*)$  is negative and the other one is zero for the condition  $\alpha\beta = 1$  (Perko, 2000). To investigate the nature of the system at  $E_*$ , we have applied Sotomayor's theorem (Sen, Banerjee & Morozov, 2012). Let the eigenvectors correspond to the zero eigenvalues of  $J_{E_*}(\beta^*)$  and  $J_{E_*}^T(\beta^*)$  be  $V$  and  $W$

, respectively, where  $V = \begin{bmatrix} 1 \\ -1 \end{bmatrix}$  and  $W = \begin{bmatrix} 0 \\ 1 \end{bmatrix}$ . From Eq. (S18), we have  $f_\beta(E_*; \beta^*) = \begin{bmatrix} 0 \\ x_* y_* \end{bmatrix}$ ,

$Df_\beta(E_*; \beta^*) = \begin{bmatrix} 0 & 0 \\ y_* & x_* \end{bmatrix}$  and  $D^2 f(E_*; \beta^*)(V, V) = \begin{bmatrix} 0 \\ -2\beta - 2\gamma \end{bmatrix}$ . Therefore,

$$W^T f_\beta(E_*; \beta^*) = 0$$

$$W^T \left[ Df_\beta(E_*; \beta^*)V \right] = y_* - x_* \neq 0$$

$$W^T \left[ D^2 f(E_*; \beta^*)(V, V) \right] = -2\beta - 2\gamma \neq 0$$

Hence the system (S16) satisfies all the necessary conditions of Sotomayor's theorem and thus the system (S16) experiences a transcritical bifurcation at the co-existence equilibrium point  $E_*$  for the bifurcation parameter  $\beta$  (Perko, 2000).

### Supplemental Information 2.1 – Finding values for dimensionless parameters

We have numerically investigated the dynamic behaviour of the system (S16) for the variation in the growth of pest populations ( $\beta$ ). Let  $\beta_0$  be the initial condition for the existence of  $E_*$ . The parameters must follow the conditions  $\alpha\gamma + 1 \geq 0$ ,  $\beta + \gamma > 0$  and  $\alpha\beta - 1 \geq 0$  and to estimate  $\beta_0$ , we consider  $\alpha = 1$  and  $\gamma = 0.001$  which satisfy all the conditions. Therefore, we get  $\beta_0 = 1$  after calculating  $\det(J_{E_*}(\beta^*)) = 0$  (Sen, Banerjee & Morozov, 2012).

Supplemental Information 2.2 – A supportive figure

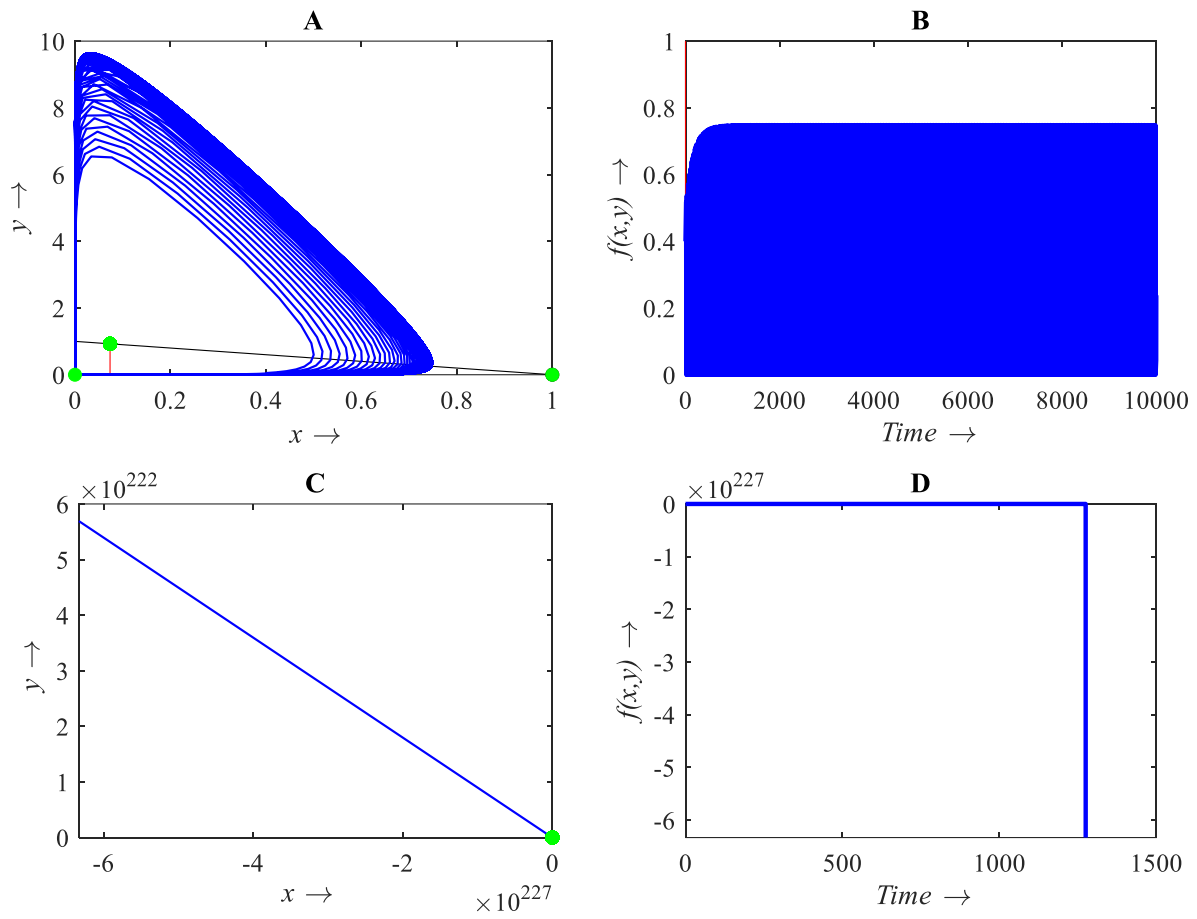

**Figure S3** (A) Phase plane of the rice-pest system (S16) for  $\beta = 13.6$ , (B) time series analysis of (A), (C) phase plane of the system (S16) for  $\beta = 13.7$ , and (D) time series analysis of (C). The system experiences a steady-state limit cycle for  $\beta = 13.6$ , and approaches  $E_I(0,0)$  for  $\beta = 13.7$  meaning that the system exticts over a long time.
